1 **Title: Potential Early Rabies Infection Detected in Two Raccoon Cases by LN34 pan-lyssavirus**  
2 **real-time RT-PCR Assay in Pennsylvania**

3  
4 Running Title: Early Rabies Infection Detected by LN34 RT-PCR

5  
6 Lisa Dettinger<sup>1\*</sup>, Crystal M. Gigante<sup>2\*</sup>, Maria Strohecker<sup>1</sup>, Melanie Seiders<sup>1</sup>, Puja Patel<sup>1</sup>, Lillian A.  
7 Orciari<sup>2</sup>, Pamela Yager<sup>2</sup>, James Lute<sup>1</sup>, Annette Regec<sup>1</sup>, Yu Li<sup>2</sup>, Dongxiang Xia<sup>1#</sup>

8  
9 <sup>1</sup>Pennsylvania Department of Health, Bureau of Laboratories, Exton, Pennsylvania; <sup>2</sup>Centers for Disease  
10 Control and Prevention, Poxvirus and Rabies Branch, Atlanta, Georgia

11 \*Co-first authors contributed equally to this work

12 #Corresponding author email address: dxia@pa.gov

13

14 **Abstract**

15 During 2017 – 2019, the Pennsylvania Department of Health Bureau of Laboratories (PABOL) tested  
16 6,855 animal samples for rabies using both the gold standard direct fluorescent antibody (DFA) test and  
17 LN34 pan-lyssavirus reverse transcriptase quantitative PCR (RT-qPCR). Two samples (0.03 %) were  
18 identified as LN34 RT-qPCR positive after failure to detect rabies virus antigen during initial DFA  
19 testing: an adult raccoon collected in 2017 and a juvenile raccoon collected in 2019. After the positive  
20 PCR result, additional tissues were collected and re-tested by DFA, where very sparse, disperse antigen  
21 was observed. Tissues from both animals were submitted to the Centers for Disease Control and  
22 Prevention (CDC) for confirmatory testing, and were confirmed positive. At both PABOL and CDC,  
23 rabies virus antigen and RNA levels were much lower than for a typical rabies case. In addition, rabies  
24 virus antigen and RNA levels were higher in brain stem and rostral spinal cord than cerebellum,  
25 hippocampus and cortex. Cross-contamination was ruled out in the case of the 2019 juvenile raccoon by  
26 sequencing, as nucleoprotein and glycoprotein gene sequences displayed >1% nucleotide differences to  
27 sequences from all positive samples processed at PABOL within two weeks of the juvenile raccoon.  
28 Taken together, the low level of rabies virus in the central nervous system combined with presence in  
29 more caudal brain structures suggest the possibility of an early infection in both cases. These two cases  
30 highlight the increased sensitivity and ease of interpretation of LN34 RT-qPCR in rabies diagnostics for  
31 the identification of low positive cases.

## 32 **Introduction**

33 Rabies is a fatal but preventable infectious disease that causes approximately 60,000 human  
34 deaths worldwide each year (1). In the United States rabies causes few human deaths thanks to the  
35 elimination of rabies variants maintained in domestic dogs and large-scale, sustained rabies control  
36 efforts (2-4). Still, rabies endemic in wildlife presents a threat to humans and domestic animals. Rabies  
37 surveillance in the United States involves over 125 rabies testing laboratories (5). Each year, more than  
38 100,000 animal samples are tested, and approximately 5,000 rabid animals are identified (5, 6). The  
39 major reservoirs are bats, raccoons, skunks, and foxes. Several distinct rabies virus variants are endemic  
40 in the United States; these variants are named based on the known or presumptive reservoir species  
41 associated with enzootic transmission. Rabies is maintained in many species of bats across the continent,  
42 and several bat rabies virus variants have been identified (7-10). Rabies variants endemic in raccoons,  
43 skunks, and foxes have distinct geographic distributions with few areas of overlap (5, 6). A single  
44 variant known as “Eastern Raccoon” rabies virus variant is endemic in raccoons along the East Coast.

45 In the United States, rabies diagnostic testing is predominantly performed using the international  
46 gold standard Direct Fluorescent Antibody test (DFA). DFA has been a reliable and sensitive rabies  
47 diagnostic test for over 60 years; however, there is a need to assess newer methods. The World Health  
48 Organization (WHO) and World Organization for Animal Health (OIE) recognize reverse transcriptase  
49 polymerase chain reaction (RT-PCR) as a diagnostic test for the detection of rabies virus (11, 12).  
50 Molecular methods such as reverse transcriptase quantitative PCR (RT-qPCR) provide several  
51 advantages over DFA testing. Many public health laboratories routinely perform RT-qPCR for detection  
52 of other pathogens and already have the equipment and expertise to implement a rabies RT-qPCR test.  
53 DFA, however, requires fluorescence microscopy expertise, which is less and less frequently used in  
54 diagnosis of other pathogens.

55 RT-PCR is not currently recommended for primary diagnostic testing of rabies samples in the  
56 United States, though it can be used as a confirmatory test (13). Laboratories across the country are  
57 currently implementing the LN34 RT-qPCR assay (14, 15) for confirmatory rabies testing. The  
58 Pennsylvania Department of Health Bureau of Laboratories (PABOL) routinely tests every suspect  
59 rabies sample by DFA and LN34 RT-qPCR. PABOL tests approximately 2,800 animals associated with  
60 human exposures for rabies annually. On average, 114 positive rabies cases are identified (4%).  
61 Raccoons and bats are the major reservoirs in Pennsylvania, and Eastern Raccoon rabies virus variant  
62 and several bat variants are endemic.

63 During 2017 – 2019, 6,855 animals were tested by both DFA and PCR at PABOL. Of those  
64 tested, only two (0.03%) were initially DFA negative but positive by LN34 RT-qPCR. In June 2017, an  
65 adult raccoon in Carbon County, PA, attacked a chicken and charged an individual. On June 1<sup>st</sup> the  
66 animal was euthanized and submitted for rabies testing. Initial DFA test was determined to be negative,  
67 but rabies virus RNA was detected by LN34 RT-qPCR. In June 2019, a mother raccoon was hit and  
68 killed on a road in Venango County, PA, leaving behind two young offspring. The two juvenile  
69 raccoons were taken into a home and kept from June 11<sup>th</sup> to 12<sup>th</sup>, during which time they were handled  
70 by four persons. On June 13<sup>th</sup>, both juveniles were euthanized and submitted for rabies testing. One  
71 juvenile was negative by both DFA and LN34 RT-qPCR. The other juvenile tested positive by LN34  
72 RT-qPCR after initial negative DFA result. The following report describes the subsequent investigation  
73 into these two cases.

74

## 75 **Materials and Methods**

76

### 77 **Samples**

78 Samples were submitted to PABOL as part of routine rabies surveillance and diagnostic testing.  
79 Animal collection was not performed as part of this study; therefore, institutional animal care and use  
80 committee approval was not necessary.

### 81 **Direct Fluorescent Antibody (DFA) Test**

82 PABOL: Brain tissue representing a full transverse cross section of brain stem and three lobes of  
83 cerebellum and/or hippocampi were minced together. These brain tissue preparations were tested used a  
84 modification of the minimum United States national standard protocol (national standard protocol) (13).  
85 Additional details can be found in the Supplemental Text.

86 CDC: Samples were tested according to the Protocol for Postmortem Diagnosis of Rabies in  
87 Animals by Direct Fluorescent Antibody Testing, A Minimum Standard for Rabies Diagnosis in the  
88 United States and Direct Fluorescent Antibody Test, WHO, Laboratory Techniques in Rabies [13, 16].  
89 Additional details can be found in the Supplemental Text.

### 90 **Real-time RT-PCR (RT-qPCR)**

91 Tissue representing a full cross section of brain stem and all three lobes of cerebellum was  
92 transferred to TRIzol Reagent (Life Technologies 15596018) and then extracted using Direct-zol RNA  
93 MiniPrep kit (R2052 Zymo, Irvine, CA, USA) following the published protocol for LN34 RT-qPCR  
94 (14). Additional RT-qPCR testing of separate tissues was performed for brain stem, rostral spinal cord,  
95 cerebellum, hippocampi and cortex. Samples were tested in duplicate on the Applied Biosystems 7500  
96 Fast Dx platform at PABOL. Samples were tested in triplicate on Applied Biosystems ViiA7 platform at  
97 CDC. LN34 Cq values were used to compare relative levels of viral RNA in different brain regions.  
98 CDC operators were not blinded to the samples.

99 Quantification of RT-qPCR results was performed using the delta delta Cq method ( $\Delta\Delta Cq$  or  
100 ddCq) (17). Average LN34 and beta actin Cq values were calculated for each brain region examined.  
101 Average actin Cq value was subtracted from the average LN34 Cq value for each brain region to

102 calculate the  $\Delta Cq$ . Brain stem was chosen as the reference tissue, so  $\Delta Cq$  for the brain stem was  
103 subtracted from  $\Delta Cq$  for other brain regions to calculate  $\Delta\Delta Cq$  for each brain region. Amount of target  
104 was estimated as  $1.93^{-\Delta\Delta Cq}$ , based on the efficiency of the LN34 assay as 93% for rabies virus based on  
105 previous estimation (14). Plot was generated in RStudio (18) using ggplot2 (19) and finished in Inkscape  
106 0.91 (inkscape.org).

## 107 Sequencing

108 Rabies virus sequencing was performed at CDC for the 2019 juvenile raccoon case and four  
109 additional positive samples that were manipulated at PABOL within two weeks of the 2019 case to rule  
110 out potential contamination. Complete rabies virus nucleoprotein and glycoprotein gene sequences were  
111 generated from rabies virus RNA extracted using Direct-zol RNA MiniPrep kit (R2052 Zymo, Irvine,  
112 CA, USA). Complete nucleoprotein and glycoprotein genes were amplified using Takara long amplicon  
113 Taq polymerase with GC buffers (RR02AG Takara Bio USA, Mountain View, CA, USA) using the  
114 primers indicated in Table 1 after cDNA synthesis using random hexamer primers and Roche AMV  
115 reverse transcriptase (10109118001 Roche, Sigma-Aldrich, St. Louis, MO, USA). Samples were  
116 multiplexed using Takara long amplicon Taq polymerase with GC buffers following the manufacturer's  
117 instructions for PCR barcoding for nanopore sequencing (EXP-PBC096 Oxford Nanopore  
118 Technologies, Oxford, UK). Samples were pooled and sequenced using the Oxford Nanopore MinION,  
119 following the manufacturer's instructions for the ligation sequencing kit (SQK-LSK108 Oxford  
120 Nanopore Technologies, Oxford, UK). Consensus sequences were generated in CLC Genomics  
121 Workbench 12 (Qiagen, Venlo, Netherlands) after read mapping to rabies virus reference genomes using  
122 `bwa mem -x ont2d` (Li arXiv:1303.3997v1 2013) and were polished using nanopolish version 0.6.0  
123 (<https://github.com/jts/nanopolish/>). Manual indel correction was then performed as described  
124 previously for the coding regions of the nucleoprotein and glycoprotein genes (20)[Gigante in  
125 preparation]. Sequence differences were determined based on coding region alignments generated using

126 mafft v7.308 (21, 22) in geneious 9.1.4 (Biomatters, Inc., Newark, NJ, USA). Phylogenetic analysis was  
127 performed by Maximum Likelihood in Mega 7.0.26 (23) using GTR+G+I model of evolution, which  
128 was determined using model test in Mega7.

## 129 **Data Availability**

130 Sequences were deposited under GenBank accession numbers (awaiting accession numbers).

131

## 132 **Results**

133

### 134 **PABOL DFA and PCR Testing**

135 During 2017 – 2019, PABOL tested 6,855 animals submitted for rabies testing. A total of 342 were  
136 positive (4.06%). Raccoon was identified as the leading host species, with 123 rabid raccoons identified,  
137 followed by cats (91), foxes (45), bats (43) and skunks (17) (Figure 1).

138 Since 2018, PABOL routinely tests all rabies samples by DFA in parallel with LN34 RT-qPCR.  
139 PABOL participated in a LN34 RT-qPCR pilot study with the Centers for Disease Control and  
140 Prevention (CDC) (14) in 2016 and fully implemented PCR along with DFA testing for all samples in  
141 2018. Among 6,855 samples tested in 2017 – 2019, discordant results were identified for only two cases  
142 (0.03%): an adult raccoon tested in 2017 (sample 1130) and a juvenile raccoon tested in 2019 (sample  
143 1059). In these two cases, the initial DFA tests were negative for rabies antigen; however, rabies virus  
144 RNA was detected by LN34 RT-qPCR (Table 2).

145 In both cases, the original tissues were reprocessed, taking separate samples from different regions  
146 of the brain, including rostral spinal cord, brain stem, cerebellum, and hippocampus. These separate  
147 brain tissues were tested by both DFA and LN34 RT-qPCR. Upon re-testing, some atypical, sparse  
148 staining was observed by DFA in brain stem and spinal cord impressions but was notably absent from  
149 cerebellum and hippocampus. Rabies virus RNA levels were low in all tissues tested for RT-qPCR, with

150 the highest levels (lowest quantification cycle (Cq) values) in spinal cord and brain stem and the lowest  
151 levels in cerebellum and hippocampus (Table 2).

### 152 **CDC DFA and PCR Testing**

153 Brain samples were sent to the Poxvirus and Rabies Branch at CDC for confirmatory testing by  
154 DFA and LN34 RT-qPCR. Aliquots of both samples were confirmed positive with low antigen  
155 distribution; however, antigen distribution varied in different regions of the brain (Table 3). For both  
156 samples, all impressions prepared from brain stem or rostral spinal cord tissue were positive, with  
157 typical antigen in <10% of fields examined. Cerebellum tissue also produced positive DFA results;  
158 however, typical rabies antigen was observed in only 2/6 slides for the 2017 adult raccoon and 3/5 slides  
159 for the 2019 juvenile raccoon. Rabies antigen distribution in the positive cerebellum slides was also in  
160 <10% of fields. Impressions from cortex and hippocampus were tested from the 2019 juvenile raccoon.  
161 One slide out of 6 showed atypical staining; the remaining 5 cortex/hippocampus slides did not contain  
162 typical rabies antigen, and the result was indeterminate.

163 In addition to brain tissues, tissue homogenates in TRIzol and extracted RNA were submitted to  
164 CDC for RT-qPCR testing for the 2019 juvenile raccoon case. All aliquots used for DFA brain  
165 impressions were tested by RT-qPCR, but TRIzol or RNA samples could not be tested by DFA. All  
166 samples exhibited amplification, indicating the presence of rabies virus RNA; although, in some cases,  
167 amplification did not reach the threshold or the Cq value was later than the cut-off for a positive sample,  
168 indicating an indeterminate result. Samples taken from brain stem, cerebellum or rostral spinal cord  
169 were all positive by RT-qPCR. All replicates produced positive results for brain stem and spinal cord  
170 samples and the cerebellum tissue from the 2017 case (Table 3). For the 2019 juvenile raccoon, only 1  
171 out of 6 replicates from two cerebellum samples produced Cq value <35 required for a positive result.  
172 Cortex and hippocampus tissue from the 2019 juvenile raccoon produced an indeterminate result



173 because Cq values were  $\geq 35$  (14). Rabies virus RNA levels were highest in the spinal cord and brain  
174 stem and lowest in the cortex/hippocampus (Figures 2 and 3).

### 175 **Investigation into potential cross-contamination**

176 Taken together, the low rabies virus RNA level and distribution pattern of antigen and RNA  
177 (highest in caudal brain regions and lowest in rostral regions) in these two cases could indicate early  
178 infection or cross-contamination. To rule-out the possibility of cross-contamination, rabies virus  
179 sequencing was performed on the 2019 juvenile case and all positive samples processed at PABOL  
180 within two weeks. These included grey fox sample 997 (processed 6/11), bat sample 1018 (processed  
181 6/13), grey fox sample 1090 (processed 6/19), and cat sample 846 (used as a positive control the week  
182 juvenile raccoon 1059 was tested). Sequencing was not performed for the 2017 case because samples  
183 were no longer available.

184 Complete nucleoprotein and glycoprotein gene sequences were generated and compared to  
185 publicly available reference sequences from representative rabies virus variants. BLAST search of rabies  
186 virus sequences from the 2019 juvenile raccoon revealed > 99% nucleotide identity with Eastern  
187 Raccoon rabies virus variant isolates from the eastern US. Phylogenetic analysis revealed the 2019  
188 juvenile raccoon sequence clustered with other Eastern Raccoon variant sequences from PA and  
189 reference sequence MK540681 (raccoon from NY 1991) (Figure 4). PA cat 846, PA fox 997 and PA fox  
190 1090 clustered with the 2019 juvenile raccoon sequence within with the Eastern Raccoon variant clade.  
191 PA bat 1018 clustered with reference JQ685920, collected from a big brown bat in PA in 1984 and  
192 rabies virus variant EF-E1 (24) that is maintained in the big brown bat, *Eptesicus fuscus*, in the eastern  
193 US.

194 The 2019 juvenile raccoon sequences exhibited many differences from all other PABOL samples  
195 processed within two weeks (Table 4). The nucleoprotein gene had 17 – 23 nucleotide differences  
196 compared to the Eastern Raccoon variant samples and 195 differences compared to bat sample 1018.

197 The glycoprotein gene had 23 – 26 changes relative to the Eastern Raccoon variant samples and 270  
198 changes relative to the bat sample. The closest PABOL sequence was fox sample 997, which exhibited  
199 98.7% and 98.5% identity to the nucleoprotein and glycoprotein genes, respectively. The 2019 juvenile  
200 raccoon sequences were more similar to an Eastern Raccoon variant isolate from NY in 1991  
201 (MK540681, with 99.04% and 99.49% identity to nucleoprotein and glycoprotein genes, respectively).  
202 Taken together, these data suggest contamination was unlikely the cause of the positive PCR result.

203

## 204 **Discussion**

205

206 We describe two cases where LN34 RT-qPCR identified rabies cases with very low viral RNA  
207 after initial DFA testing failed to detect the presence of rabies virus antigen. Repeat testing at PABOL  
208 and confirmatory testing at CDC confirmed both as positive rabies cases, and appropriate public health  
209 response was initiated. These cases highlight the sensitivity and objectivity of PCR in cases with low  
210 rabies virus antigen and RNA and support the addition of PCR for routine rabies diagnostic testing.

### 211 **Real-time RT-PCR in rabies diagnosis of low positive samples**

212 A false negative result for a rabies diagnostic test is extremely serious because rabies is nearly  
213 always fatal if post exposure treatment is not administered promptly. The DFA has been used for over 60  
214 years in the United States with no known deaths caused by failures to detect rabies cases. With these two  
215 cases, RT-qPCR demonstrated higher sensitivity than DFA at PABOL, and the reasons behind this are  
216 worth considering.

217 PABOL tests thousands of samples each year, and the concordance rate for DFA with PCR was  
218 99.97% for 6,855 samples. If there was a systemic issue with DFA testing at PABOL, a lower  
219 concordance rate with LN34 would be expected, similar to what has been reported previously for  
220 laboratories with systemic DFA issues (false positives) (14). One observation worth noting is the

221 practice of making impressions from minced brain tissues at PABOL. The United States national  
222 standard protocol (13) and WHO (16) recommend that impressions are taken directly from tissue for  
223 DFA testing. However, repeat testing of tissue impressions from these cases also produced negative DFA  
224 results at PABOL. The national standard protocol (13) was developed to avoid differences between  
225 laboratories.

226 In general, any differences in DFA test procedures between laboratories can affect test results  
227 (25) and should be avoided. The DFA procedure could vary between laboratories due to differences in  
228 commercial monoclonal antibody reagents or if optimal working dilutions of conjugate were not  
229 prepared properly (13, 26). Differences in fluorescence microscopes and objective lens quality could, in  
230 theory, produce different results for a sample with extremely low antigen level. The DFA relies heavily  
231 on the expertise of the person interpreting results, who must be able to distinguish typical fluorescent  
232 rabies virus antigen from non-specific fluorescent objects such as bacteria or artifacts in the tissue. All  
233 atypical, weak or unusual tests are repeated using a specificity control or sent to CDC for confirmation.

234 During initial testing at PABOL by DFA, one slide containing brain stem and cerebellum was  
235 tested for each sample and results were negative. Prompted by the positive PCR result, DFA re-testing  
236 was initiated. Many impressions were made from different brain regions, increasing opportunity to  
237 detect sparse antigen at both labs. However, antigen was detected in every brain stem impression tested  
238 at CDC for both samples.

239 In contrast to DFA, PCR methods are easier to standardize, and result interpretation is inherently  
240 more objective. Primer and probe sequences and concentration can be defined in protocols for high  
241 reproducibility between laboratories and uniformity between manufacturers and lots. Currently, CDC  
242 provides a standardized positive control to ensure proper performance of the LN34 across laboratories.  
243 Test output is a quantitative Cq value, which determines positive, negative or indeterminate result based  
244 on its numeric value. However, the high sensitivity of PCR can lead to false positive results caused by

245 cross-contamination, especially in laboratories inexperienced with PCR. In most cases, cross-  
246 contamination can be avoided through good laboratory practice.

247 Many laboratories in the United States already employ RT-PCR as a confirmatory test for rabies  
248 when DFA exhibits non-specific staining. In these cases, RT-PCR can confirm a negative result and  
249 avoid unnecessary post-exposure prophylaxis for exposed humans or reduce quarantine for exposed  
250 animals. The findings from the two PA raccoon cases support expanding the role of PCR in rabies  
251 diagnosis in the United States. If PCR were routinely performed on all samples with DFA, it may  
252 improve sensitivity and increase the ability of laboratories to detect rabies cases with extremely sparse  
253 and non-uniform antigen distribution.

#### 254 **Potential early rabies infection in two raccoon cases**

255 Taken together, the low rabies virus level and observed distribution pattern (highest in the most  
256 caudal brain regions and lowest in rostral regions) are suggestive of early rabies virus infection. In  
257 laboratory animals, early infections are characterized by decreasing viral load from the brain stem to the  
258 forebrain, especially during peripheral, non-mucosal infections (27, 28), which is very similar to what  
259 was observed in these two PA raccoon cases. It remains unclear if animals are capable of transmitting  
260 virus during very early infections. For rabies virus to be transmitted, it must travel to the central nervous  
261 system and then back out to the periphery, specifically to the nerve endings in the salivary glands. Once  
262 in the salivary glands, rabies virus is secreted in saliva and can be transmitted by a bite. It would be  
263 interesting to see if virus was present in the salivary glands of these animals despite the low level of  
264 antigen and RNA in the brain; however, tissue was not available.

265 The presence of rabies virus neutralizing antibodies can interfere with infection and lead to low  
266 viral levels in the brain, which could explain the low antigen and RNA levels observed. Animals can  
267 develop virus neutralizing antibodies after vaccination, and vaccinated animals with sub-protective  
268 immunity can succumb to rabies virus infection (29-36). Oral rabies vaccination baits are distributed in

269 western Pennsylvania as part of USDA's raccoon rabies control program. The 2019 juvenile raccoon  
270 case was from Venango County in western PA, adjacent to the oral vaccination zone. It is possible that  
271 the 2019 juvenile raccoon was partially immunized but not fully protected from rabies infection,  
272 possibly through inherited maternal antibodies. The 2017 adult raccoon was collected in Carbon County  
273 in eastern Pennsylvania; it is unlikely this raccoon encountered oral vaccine. However, even in rabies  
274 enzootic and epizootic areas without wildlife vaccination, wild animals have been shown to have  
275 neutralizing antibodies attributed to acquired immunity from sublethal exposures (35, 37-42).  
276 Unfortunately, serum samples were not available from either animal for testing.

277         In this study, brain stem and rostral spinal cord were the most reliable tissue for rabies detection.  
278 Both DFA and PCR tests on cerebellum and hippocampus produced negative or indeterminate results for  
279 at least some replicates. The brain stem is one of the first brain structures where rabies virus is observed  
280 in natural infections or after experimental inoculation in peripheral muscle or foot (43-49). The  
281 increased reliability of brain stem and cerebellum for rabies diagnosis has been well documented in the  
282 literature, and insufficient sampling can lead to false negative results (43, 47, 50-54). For DFA, typical  
283 rabies antigen in the hippocampus and cerebellum can be more obvious due to large inclusions  
284 sometimes observed in pyramidal and Purkinje neuron somas (49). In early infections, antigen may  
285 present as dust-like particles in the axon bundles of the brain stem; although, more frequently inclusions  
286 of all sizes are also present. DFA testing personnel should be familiarized with both presentation types.  
287 A full cross section of brain stem and tissue from cerebellum or hippocampus is currently recommended  
288 for rabies diagnostic testing by WHO, OIE, and the US minimal national standard protocol (11-13, 50);  
289 spinal cord is not recommended for rabies diagnostic testing. It should be emphasized that neither DFA  
290 nor PCR can rule-out rabies if required brain areas are not available or recognizable.

## 291 **Investigation into potential cross-contamination**

292 Cross-contamination can occur at several steps of tissue processing, sample preparation or during  
293 testing. An extensive search into potential contamination was performed for the 2019 juvenile raccoon  
294 case. Because the most likely source of contamination was positive samples processed around the same  
295 time, all such samples were sequenced. Sequencing was able to rule-out contamination because  
296 sequences from the juvenile raccoon displayed >1% differences to sequences from all positive samples  
297 processed at PABOL within two weeks of when the juvenile raccoon was processed.

298

## 299 **Conclusion**

300

301 Accurate and timely primary diagnosis of rabies in animals is essential for subsequent post-  
302 exposure prophylaxis of exposed individuals. The 2017 and 2019 PA rabies cases demonstrate the  
303 sensitivity and objectivity of PCR in the identification of cases with low rabies virus as well as the need  
304 to test a cross section of brain stem for rabies diagnosis. These cases also highlight the importance of  
305 sampling, following standardized protocols, using multiple highly sensitive tests routinely, and  
306 submitting all samples with unexpected or atypical results to a reference laboratory for confirmatory  
307 testing especially when of public health importance.

308

## 309 **Acknowledgements**

310

311 The authors would like to thank the additional members of the CDC Poxvirus and Rabies Branch and  
312 PABOL for help in planning, procuring funding, and discussion related to this project. This research  
313 received no specific grant from any funding agency in the public, commercial, or not-for-profit sectors.  
314 C.M.G. was supported in part by an appointment to the Research Participation Program at CDC,  
315 administered by the Oak Ridge Institute for Science and Education through an interagency agreement

316 between the U.S. Department of Energy and CDC. The funders had no role in study design, data  
317 collection and interpretation, or the decision to submit the work for publication. Use of trade names and  
318 commercial sources is for identification only and does not imply endorsement by the Centers for Disease  
319 Control and Prevention, the Public Health Service, or the U.S. Department of Health and Human  
320 Services. The conclusions, findings, and opinions expressed by authors do not necessarily reflect the  
321 official position of the U.S. Department of Health and Human Services, the Public Health Service, the  
322 Centers for Disease Control and Prevention, or the authors' affiliated institutions.

323

324 **References**

325

- 326 1. Hampson K, Coudeville L, Lembo T, Sambo M, Kieffer A, Attlan M, Barrat J, Blanton JD, Briggs DJ,  
327 Cleaveland S, Costa P, Freuling CM, Hiby E, Knopf L, Leanes F, Meslin FX, Metlin A, Miranda ME,  
328 Muller T, Nel LH, Recuenco S, Rupprecht CE, Schumacher C, Taylor L, Vigilato MA, Zinsstag J,  
329 Dushoff J, Global Alliance for Rabies Control Partners for Rabies P. 2015. Estimating the global burden  
330 of endemic canine rabies. *PLoS Negl Trop Dis* 9:e0003709.
- 331 2. Belotto A, Leanes LF, Schneider MC, Tamayo H, Correa E. 2005. Overview of rabies in the Americas.  
332 *Virus Res* 111:5-12.
- 333 3. Hanlon CA, Childs JE, Nettles VF. 1999. Recommendations of a National Working Group on Prevention  
334 and Control of Rabies in the United States. Article III: Rabies in wildlife. National Working Group on  
335 Rabies Prevention and Control. *J Am Vet Med Assoc* 215:1612-8.
- 336 4. Smith JS. 1996. New aspects of rabies with emphasis on epidemiology, diagnosis, and prevention of the  
337 disease in the United States. *Clin Microbiol Rev* 9:166-76.
- 338 5. Ma X, Monroe BP, Cleaton JM, Orciari LA, Gigante CM, Kirby JD, Chipman RB, Fehlner-Gardiner C,  
339 Gutierrez Cedillo V, Petersen BW, Olson V, Wallace RM. 2020. Public Veterinary Medicine: Public  
340 Health: Rabies surveillance in the United States during 2018. *J Am Vet Med Assoc* 256:195-208.
- 341 6. Ma X, Monroe BP, Cleaton JM, Orciari LA, Li Y, Kirby JD, Chipman RB, Petersen BW, Wallace RM,  
342 Blanton JD. 2018. Rabies surveillance in the United States during 2017. *J Am Vet Med Assoc* 253:1555-  
343 1568.
- 344 7. Smith JS. 1988. Monoclonal antibody studies of rabies in insectivorous bats of the United States. *Rev*  
345 *Infect Dis* 10 Suppl 4:S637-43.
- 346 8. Constantine DG, Blehert DS. 2009. Bat rabies and other lyssavirus infections. US Geological Survey  
347 Reston VA (US).
- 348 9. Smith JS, Orciari LA, Yager PA. Molecular epidemiology of rabies in the United States, p 387-400.  
349 Elsevier.



- 350 10. Nadin-Davis SA, Huang W, Armstrong J, Casey GA, Bahloul C, Tordo N, Wandeler AI. 2001. Antigenic  
351 and genetic divergence of rabies viruses from bat species indigenous to Canada. *Virus Res* 74:139-56.
- 352 11. World Health Organization. 2018. WHO expert consultation on rabies: third report, vol 1012. World  
353 Health Organization.
- 354 12. World Organization for Animal Health (OIE). 2018. Rabies (infection with rabies virus) Manual of  
355 diagnostic tests and vaccines for terrestrial animals, 8th ed. Office International des Epizooties.
- 356 13. Ronald GP, Powell J, Raj P, Rudd R, Rupprecht C, Schnurr D, Smith J, Trimarchi C. 2003. Protocol for  
357 postmortem diagnosis of rabies in animals by direct fluorescent antibody testing: a minimum standard for  
358 rabies diagnosis in the United States. [www.cdc.gov/rabies/pdf/rabiesdfaspv2.pdf](http://www.cdc.gov/rabies/pdf/rabiesdfaspv2.pdf).
- 359 14. Gigante CM, Dettinger L, Powell JW, Seiders M, Condori REC, Griesser R, Okogi K, Carlos M, Pesko  
360 K, Breckenridge M, Simon EMM, Chu M, Davis AD, Brunt SJ, Orciari L, Yager P, Carson WC, Hartloge  
361 C, Saliki JT, Sanchez S, Deldari M, Hsieh K, Wadhwa A, Wilkins K, Peredo VY, Rabideau P, Gruhn N,  
362 Cadet R, Isloor S, Nath SS, Joseph T, Gao J, Wallace R, Reynolds M, Olson VA, Li Y. 2018. Multi-site  
363 evaluation of the LN34 pan-lyssavirus real-time RT-PCR assay for post-mortem rabies diagnostics. *PLoS*  
364 *One* 13:e0197074.
- 365 15. Wadhwa A, Wilkins K, Gao J, Condori Condori RE, Gigante CM, Zhao H, Ma X, Ellison JA, Greenberg  
366 L, Velasco-Villa A, Orciari L, Li Y. 2017. A Pan-Lyssavirus Taqman Real-Time RT-PCR Assay for the  
367 Detection of Highly Variable Rabies virus and Other Lyssaviruses. *PLoS Negl Trop Dis* 11:e0005258.
- 368 16. World Health Organization. 2019. The direct fluorescent antibody test. *In* Rupprecht CE, Fooks AR,  
369 Abela-Ridder B (ed), *Laboratory techniques in rabies*, volume 1, 5 ed, vol 2. World Health Organization,  
370 Geneva.
- 371 17. Livak KJ, Schmittgen TD. 2001. Analysis of relative gene expression data using real-time quantitative  
372 PCR and the  $2^{-(\Delta\Delta C(T))}$  Method. *Methods* 25:402-8.
- 373 18. RStudio Team. 2015. RStudio: Integrated Development for R. RStudio, Inc., Boston, MA  
374 <http://www.rstudio.com/>.
- 375 19. Wickham H. 2009. *ggplot2: Elegant Graphics for Data Analysis*. Springer-Verlag New York.

- 376 20. Cardenas-Canales EM, Gigante CM, Greenberg L, Velasco-Villa A, Ellison JA, Satheskumar PS,  
377 Medina-Magues LG, Griesser R, Falendysz E, Amezcua I, Osorio JE, Rocke TE. 2020. Clinical  
378 Presentation and Serologic Response during a Rabies Epizootic in Captive Common Vampire Bats  
379 (*Desmodus rotundus*). *Trop Med Infect Dis* 5.
- 380 21. Katoh K, Standley DM. 2013. MAFFT multiple sequence alignment software version 7: improvements in  
381 performance and usability. *Mol Biol Evol* 30:772-80.
- 382 22. Katoh K, Toh H. 2008. Recent developments in the MAFFT multiple sequence alignment program. *Brief*  
383 *Bioinform* 9:286-98.
- 384 23. Kumar S, Stecher G, Tamura K. 2016. MEGA7: Molecular Evolutionary Genetics Analysis Version 7.0  
385 for Bigger Datasets. *Mol Biol Evol* 33:1870-4.
- 386 24. Kuzmin IV, Shi M, Orciari LA, Yager PA, Velasco-Villa A, Kuzmina NA, Streicker DG, Bergman DL,  
387 Rupprecht CE. 2012. Molecular inferences suggest multiple host shifts of rabies viruses from bats to  
388 mesocarnivores in Arizona during 2001-2009. *PLoS Pathog* 8:e1002786.
- 389 25. Rudd RJ, Smith JS, Yager PA, Orciari LA, Trimarchi CV. 2005. A need for standardized rabies-virus  
390 diagnostic procedures: effect of cover-glass mountant on the reliability of antigen detection by the  
391 fluorescent antibody test. *Virus Res* 111:83-8.
- 392 26. Trimarchi CV, Debbie JG. 1972. Standardization and quantitation of immunofluorescence in the rabies  
393 fluorescent-antibody test. *Appl Microbiol* 24:609-12.
- 394 27. Murphy FA. 1977. Rabies pathogenesis. *Arch Virol* 54:279-97.
- 395 28. Charlton K, Casey G, Wandeler A, Nadin-Davis SJAn. 1995. Early events in rabies virus infection of the  
396 central nervous system in skunks (*Mephitis mephitis*). 91:89-98.
- 397 29. Aubert MF. 1992. Practical significance of rabies antibodies in cats and dogs. *Rev Sci Tech* 11:735-60.
- 398 30. Murray KO, Holmes KC, Hanlon CA. 2009. Rabies in vaccinated dogs and cats in the United States,  
399 1997-2001. *J Am Vet Med Assoc* 235:691-5.
- 400 31. Rupprecht CE, Wiktor TJ, Johnston DH, Hamir AN, Dietzschold B, Wunner WH, Glickman LT,  
401 Koprowski H. 1986. Oral immunization and protection of raccoons (*Procyon lotor*) with a vaccinia-rabies  
402 glycoprotein recombinant virus vaccine. *Proc Natl Acad Sci U S A* 83:7947-50.

- 403 32. Rupprecht CE, Hamir AN, Johnston DH, Koprowski H. 1988. Efficacy of a vaccinia-rabies glycoprotein  
404 recombinant virus vaccine in raccoons (*Procyon lotor*). *Rev Infect Dis* 10 Suppl 4:S803-9.
- 405 33. Fehlner-Gardiner C, Rudd R, Donovan D, Slate D, Kempf L, Badcock J. 2012. Comparing ONRAB(R)  
406 AND RABORAL V-RG(R) oral rabies vaccine field performance in raccoons and striped skunks, New  
407 Brunswick, Canada, and Maine, USA. *J Wildl Dis* 48:157-67.
- 408 34. Gilbert AT, Johnson SR, Nelson KM, Chipman RB, VerCauteren KC, Algeo TP, Rupprecht CE, Slate D.  
409 2018. Field Trials of Ontario Rabies Vaccine Bait in the Northeastern USA, 2012-14. *J Wildl Dis* 54:790-  
410 801.
- 411 35. Slate D, Chipman RB, Algeo TP, Mills SA, Nelson KM, Croson CK, Dubovi EJ, Vercauteren K,  
412 Renshaw RW, Atwood T, Johnson S, Rupprecht CE. 2014. Safety and immunogenicity of Ontario Rabies  
413 Vaccine Bait (ONRAB) in the first us field trial in raccoons (*Procyon lotor*). *J Wildl Dis* 50:582-95.
- 414 36. Blanton JD, Niezgodka M, Hanlon CA, Swope CB, Suckow J, Saidu B, Nelson K, Chipman RB, Slate D.  
415 2018. Evaluation of Oral Rabies Vaccination: Protection against Rabies in Wild Caught Raccoons (  
416 *Procyon Lotor*). *J Wildl Dis* 54:520-527.
- 417 37. Bell JF, Sancho MI, Diaz AM, Moore GJ. 1972. Nonfatal rabies in an enzootic area: results of a survey  
418 and evaluation of techniques. *Am J Epidemiol* 95:190-8.
- 419 38. Botros BA, Lewis JC, Kerkor M. 1979. A study to evaluate non-fatal rabies in animals. *J Trop Med Hyg*  
420 82:137-41.
- 421 39. McLean RG. 1971. Rabies in raccoons in the Southeastern United States. *J Infect Dis* 123:680-1.
- 422 40. Ramey PC, Blackwell BF, Gates RJ, Slemmons RD. 2008. Oral rabies vaccination of a northern Ohio  
423 raccoon population: relevance of population density and prebait serology. *J Wildl Dis* 44:553-68.
- 424 41. Bigler WJ, McLean RG, Trevino HA. 1973. Epizootiologic aspects of raccoon rabies in Florida. *Am J*  
425 *Epidemiol* 98:326-35.
- 426 42. East ML, Hofer H, Cox JH, Wulle U, Wiik H, Pitra C. 2001. Regular exposure to rabies virus and lack of  
427 symptomatic disease in Serengeti spotted hyenas. *Proc Natl Acad Sci U S A* 98:15026-31.
- 428 43. Jackson AC, Reimer DL. 1989. Pathogenesis of experimental rabies in mice: an immunohistochemical  
429 study. *Acta Neuropathol* 78:159-65.

- 430 44. Tang Y, Rampin O, Giuliano F, Ugolini G. 1999. Spinal and brain circuits to motoneurons of the  
431 bulbospongiosus muscle: retrograde transneuronal tracing with rabies virus. *J Comp Neurol* 414:167-92.
- 432 45. Shankar V, Dietzschold B, Koprowski H. 1991. Direct entry of rabies virus into the central nervous  
433 system without prior local replication. *J Virol* 65:2736-8.
- 434 46. Tirawatnpong S, Hemachudha T, Manutsathit S, Shuangshoti S, Phanthumchinda K, Phanuphak P. 1989.  
435 Regional distribution of rabies viral antigen in central nervous system of human encephalitic and paralytic  
436 rabies. *J Neurol Sci* 92:91-9.
- 437 47. Bingham J, van der Merwe M. 2002. Distribution of rabies antigen in infected brain material: determining  
438 the reliability of different regions of the brain for the rabies fluorescent antibody test. *J Virol Methods*  
439 101:85-94.
- 440 48. Juntrakul S, Ruangvejvorachai P, Shuangshoti S, Wacharapluesadee S, Hemachudha T. 2005.  
441 Mechanisms of escape phenomenon of spinal cord and brainstem in human rabies. *BMC Infect Dis* 5:104.
- 442 49. Murphy FA, Harrison AK, Winn WC, Bauer SP. 1973. Comparative pathogenesis of rabies and rabies-  
443 like viruses: infection of the central nervous system and centrifugal spread of virus to peripheral tissues.  
444 *Lab Invest* 29:1-16.
- 445 50. Meslin FX, Kaplin M, Koprowski H. 1996. *Laboratory Techniques in Rabies*. World Health  
446 Organization, Geneva.
- 447 51. Hicks DJ, Nunez A, Healy DM, Brookes SM, Johnson N, Fooks AR. 2009. Comparative pathological  
448 study of the murine brain after experimental infection with classical rabies virus and European bat  
449 lyssaviruses. *J Comp Pathol* 140:113-26.
- 450 52. Stein LT, Rech RR, Harrison L, Brown CC. 2010. Immunohistochemical study of rabies virus within the  
451 central nervous system of domestic and wildlife species. *Vet Pathol* 47:630-3.
- 452 53. Dean D, Abelseth M. 1973. The fluorescent antibody test, p 73-84. *In* Kaplan M, Koprowski H (ed),  
453 *Laboratory techniques in rabies*. World Health Organization, Geneva.
- 454 54. Chopra JS, Banerjee AK, Murthy JM, Pal SR. 1980. Paralytic rabies: a clinico-pathological study. *Brain*  
455 103:789-802.

456 **Figure Legends**

457

458 **Figure 1.** Distributions of positive rabies samples tested at PABOL during 2017 – 2019 by host animal.

459 Raccoons accounted for 37% (42/113), 31% (29/95) and 39% (52/134) of positive cases each year,  
460 respectively.

461

462 **Figure 2.** PCR amplification curves produced by LN34 RT-qPCR of different brain tissues from the  
463 2019 PA juvenile raccoon. Increasing rabies virus RNA level, as indicated by earlier amplification, can  
464 be observed from hippocampus to cerebellum to brain stem to rostral spinal cord. Threshold used for Cq  
465 value calculation is shown by dotted line. Triplicate results are shown.

466

467 **Figure 3.** Relative rabies virus RNA level in different brain regions of 2017 and 2019 PA raccoon  
468 samples. Rabies virus RNA (LN34 Cq value) was normalized to beta actin level and compared to brain  
469 stem using the  $\Delta\Delta Cq$  method (17). SC spinal cord, BS brain stem, CB/BS mix of brain stem and  
470 cerebellum, CB cerebellum, HC hippocampus/cortex.

471

472 **Figure 4.** Phylogenetic trees showing clustering of PA 2019 juvenile raccoon rabies virus nucleoprotein  
473 (left) and glycoprotein (right) sequences with other rabies positive PA and reference sequences.  
474 Reference sequences from Eastern Raccoon (RAC), South Central Skunk (SCSK), *Eptesicus fuscus*  
475 Eastern 1 (EF-E1), North Central Skunk (NCSK) and South East Asia 3 (SEA3) rabies virus variants are  
476 shown with accession numbers. Branch color indicates variant: green is RAC, blue is SCSK, yellow is  
477 EF-E1, orange is NCSK and red is SEA3. The percentage of trees in which the associated taxa clustered  
478 together is shown next to the branches (based on 1,000 bootstraps). Scale bar indicates number of  
479 substitutions per site.

480 **Tables**

481

482 **Table 1.** Rabies primers used for sequencing in this study. Note: primers include 5' sequence for adding  
 483 Oxford Nanopore barcode sequences by PCR.

484

| Primer                | Sequence                                                                                                       | 485 |
|-----------------------|----------------------------------------------------------------------------------------------------------------|-----|
| Nucleoprotein Forward | TTTCTGTTGGTGCTGATATTGCACGCTTAACAACCAGATCAAAGAA<br>TTTCTGTTGGTGCTGATATTGCACGCTTAACAACAAATCADAGAAG <sup>36</sup> |     |
| Nucleoprotein Reverse | ACTTGCTGTCGCTCTATCTTCAGGAGGRGTGTTAGTTTTTTTC                                                                    |     |
| Glycoprotein Forward  | TTTCTGTTGGTGCTGATATTGCGATGTGAAAAAACTATYAACATCC <sup>487</sup>                                                  |     |
| Glycoprotein Reverse  | ACTTGCTGTCGCTCTATCTTCTGTGAKCTATTGCTTRTGTCTTCA                                                                  | 488 |

489

490 **Table 2.** DFA and RT-qPCR results from PABOL. Average rabies virus (LN34) Cq value is given for  
 491 each sample, where lower Cq value indicates higher rabies virus RNA level. Cq value >35 was used to  
 492 define indeterminate result for LN34 RT-qPCR, based on previous publication [15]. NA: sample not  
 493 available. ND: not detected. \*Initial minced tissue from hippocampus, cerebellum, brain stem and spinal  
 494 cord.

495

|                             |                | DFA Results |            |         | PCR results   |            |          |
|-----------------------------|----------------|-------------|------------|---------|---------------|------------|----------|
|                             |                | Result      | Replicates | Antigen | Result        | Replicates | Ct Value |
| 2019<br>Juvenile<br>Raccoon | Minced tissue* | Negative    | 0/1        | ND      | Positive      | 2/2        | 34.1     |
|                             | Hippocampus    | Negative    | 0/1        | ND      | NA            | NA         | NA       |
|                             | Cerebellum     | Negative    | 0/1        | ND      | Negative      | 0/2        | ND       |
|                             | Brain stem     | Negative    | 0/1        | ND      | Indeterminate | 2/2        | 35.5     |
|                             | Spinal cord    | Negative    | 0/1        | ND      | Positive      | 2/2        | 32.7     |
| 2017<br>Adult<br>Raccoon    | Minced tissue* | Negative    | 0/1        | ND      | Positive      | 8/8        | 32.1     |
|                             | Cerebellum     | Negative    | 0/1        | ND      | NA            | NA         | NA       |
|                             | Brain stem     | Negative    | 0/1        | ND      | NA            | NA         | NA       |
|                             | Spinal cord    | Negative    | 0/1        | ND      | Positive      | 2/2        | 34.2     |

496

497

498 **Table 3.** DFA and RT-qPCR results from CDC. Antigen distribution refers to percent of fields showing  
 499 positive rabies antigen. Average rabies virus (LN34) Cq value is given for each sample, where lower Cq  
 500 value indicates higher rabies virus RNA level. Cq value >35 was used to define indeterminate result for  
 501 LN34 RT-qPCR, based on previous publication (14). NA sample not tested. \*Average Cq values do not  
 502 include replicates that did not produce Cq values (1/3 for cortex/hippocampus and 2/6 for cerebellum).  
 503 The 2019 cortex/hippocampus tissue also contained remaining brain tissue from the head.

504

|                             |                    | DFA Results   |            |          | PCR results   |            |          |
|-----------------------------|--------------------|---------------|------------|----------|---------------|------------|----------|
|                             |                    | Result        | Replicates | Antigen  | Result        | Replicates | Ct Value |
| 2019<br>Juvenile<br>Raccoon | Cortex/Hippocampus | Indeterminate | 1/6        | Atypical | Indeterminate | 2/3        | 42.6*    |
|                             | Cerebellum         | Positive      | 3/5        | <10%     | Positive      | 1/6        | 39.0*    |
|                             | Brain stem         | Positive      | 3/3        | <10%     | Positive      | 3/3        | 35.0     |
|                             | Spinal cord        | NA            | NA         | NA       | Positive      | 3/3        | 32.4     |
| 2017<br>Adult<br>Raccoon    | Cerebellum         | Positive      | 2/6        | <10%     | Positive      | 3/3        | 31.8     |
|                             | Brain stem         | Positive      | 1/1        | <10%     | Positive      | 3/3        | 31.4     |
|                             | Spinal cord        | Positive      | 1/1        | <10%     | NA            | NA         | NA       |

505

506

507 **Table 4.** Distance matrix showing number of nucleotide differences between the rabies virus isolated  
 508 from the 2019 juvenile raccoon (2019 PA Juv Rac), samples processed around the same time as the  
 509 juvenile raccoon and reference sequences. Numbers in the top right are differences in the nucleoprotein  
 510 coding region; numbers in the bottom left are differences in the glycoprotein coding region. Differences  
 511 relative to the 2019 juvenile raccoon are shown in bold. Reference sequences from Eastern Raccoon  
 512 (RAC), South Central Skunk (SCSK), *Eptesicus fuscus* Eastern 1 (EF-E1), and North Central Skunk  
 513 (NCSK) rabies virus variants are shown with accession numbers. Color indicates rabies virus variant:  
 514 green is RAC, blue is SCSK, yellow is EF-E1 and orange is NCSK.

|                        | JQ685944<br>NCSK | 2019 PA<br>Cat 846 | 2019 PA<br>Fox 997 | MK540681<br>RAC | <b>2019 PA<br/>Juv Rac</b> | 2019 PA<br>Fox 090 | JQ685968<br>SCSK | 2019 PA<br>Bat 018 | JQ685920<br>EF-E1 |
|------------------------|------------------|--------------------|--------------------|-----------------|----------------------------|--------------------|------------------|--------------------|-------------------|
| JQ685944 NCSK          |                  | 230                | 228                | 231             | 234                        | 235                | 239              | 190                | 191               |
| 2019 PA Cat 846        | 329              |                    | 14                 | 10              | <b>21</b>                  | 20                 | 168              | 197                | 198               |
| 2019 PA Fox 997        | 335              | 37                 |                    | 6               | <b>17</b>                  | 18                 | 165              | 194                | 195               |
| MK540681 RAC           | 332              | 20                 | 19                 |                 | 13                         | 16                 | 164              | 196                | 195               |
| <b>2019 PA Juv Rac</b> | 335              | <b>26</b>          | <b>23</b>          | 8               |                            | <b>25</b>          | 168              | <b>195</b>         | 194               |
| 2019 PA Fox 090        | 331              | 31                 | 32                 | 17              | <b>23</b>                  |                    | 164              | 200                | 198               |
| JQ685968 SCSK          | 339              | 251                | 244                | 248             | 252                        | 255                |                  | 211                | 209               |
| 2019 PA Bat 018        | 291              | 268                | 273                | 268             | <b>270</b>                 | 264                | 285              |                    | 18                |
| JQ685920 EF-E1         | 290              | 270                | 275                | 270             | 272                        | 266                | 296              | 19                 |                   |

515

516

517



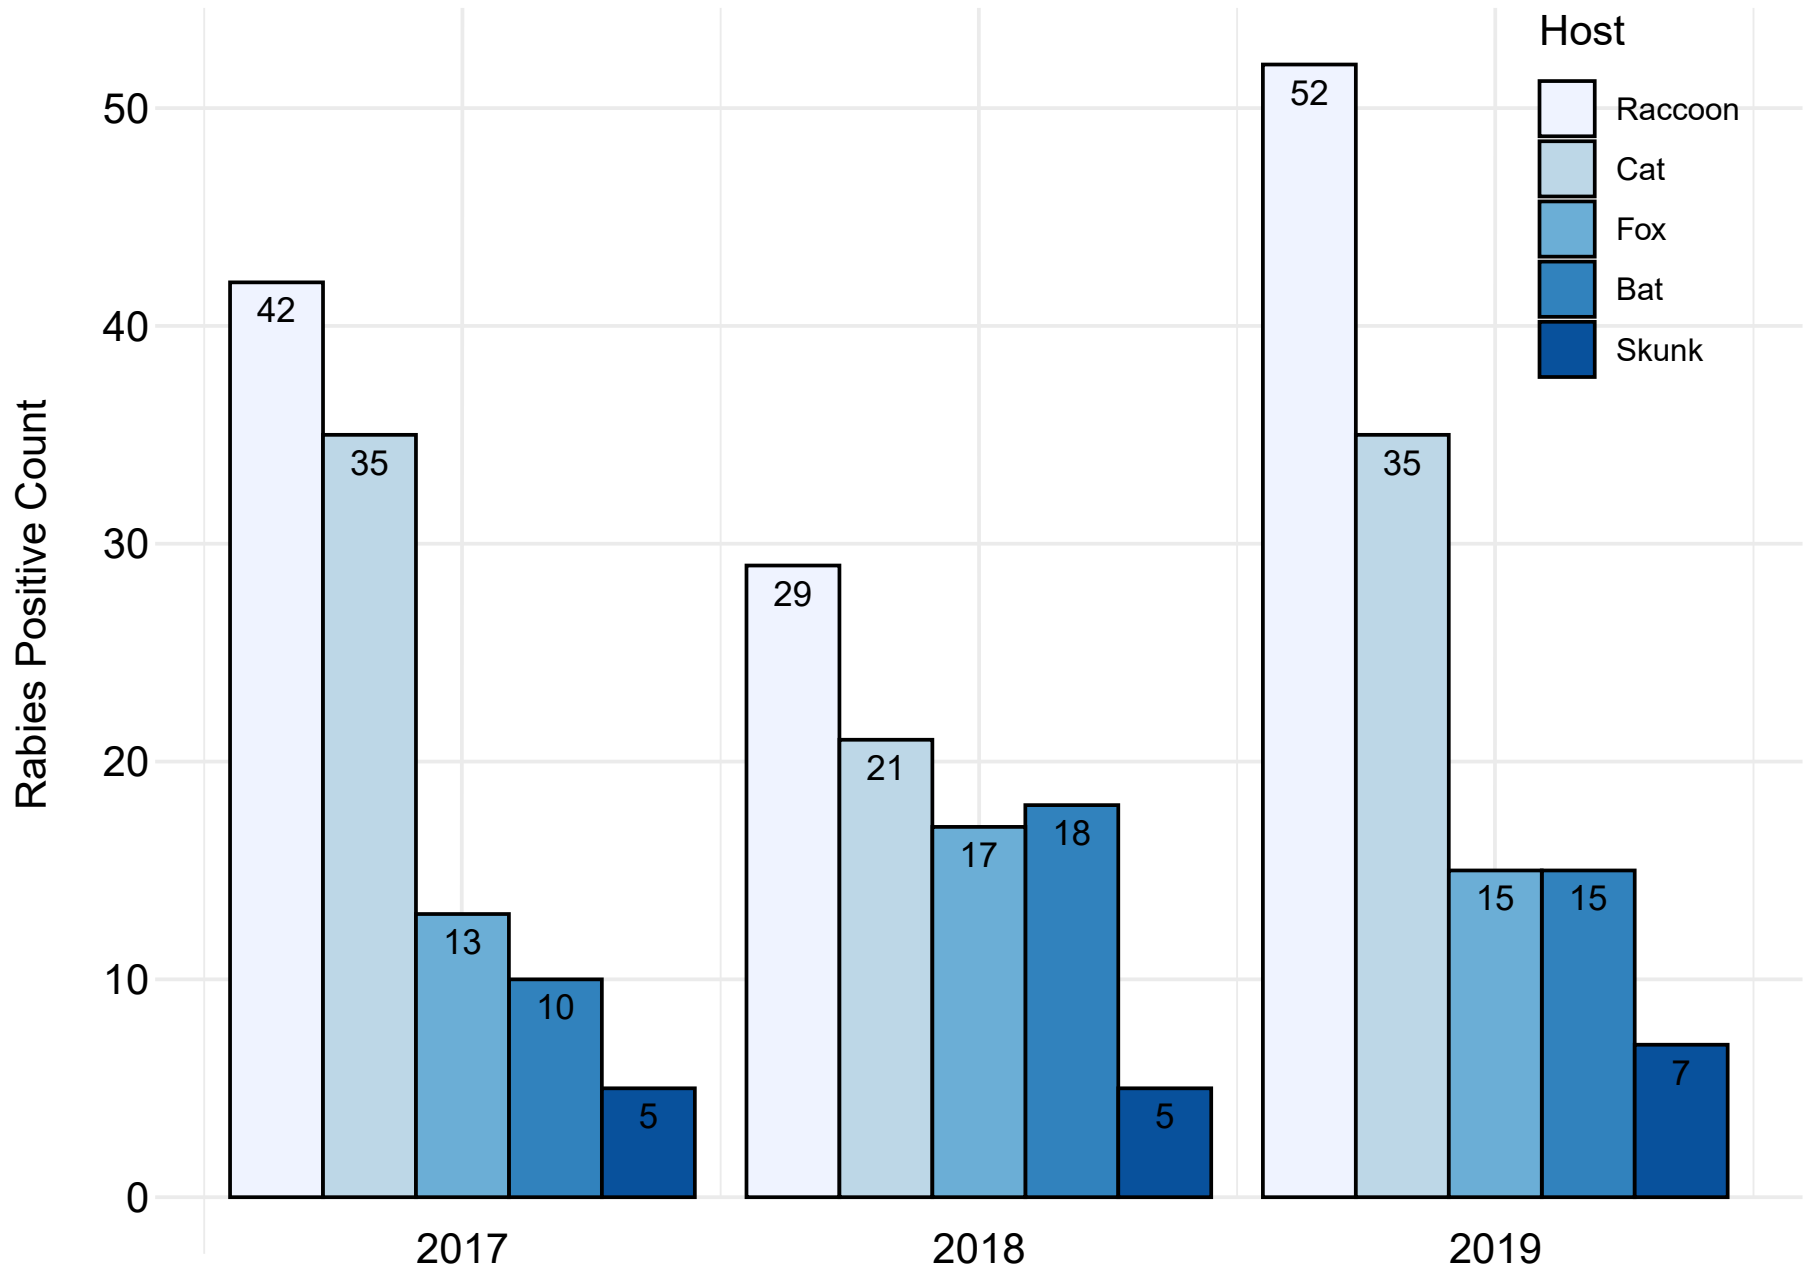

Figure 1. Distributions of positive rabies samples tested at PABOL during 2017 - 2019 by host animal. Raccoons accounted for 37% (42/113), 31% (29/95), and 39% (52/134) of positive cases each year, respectively.

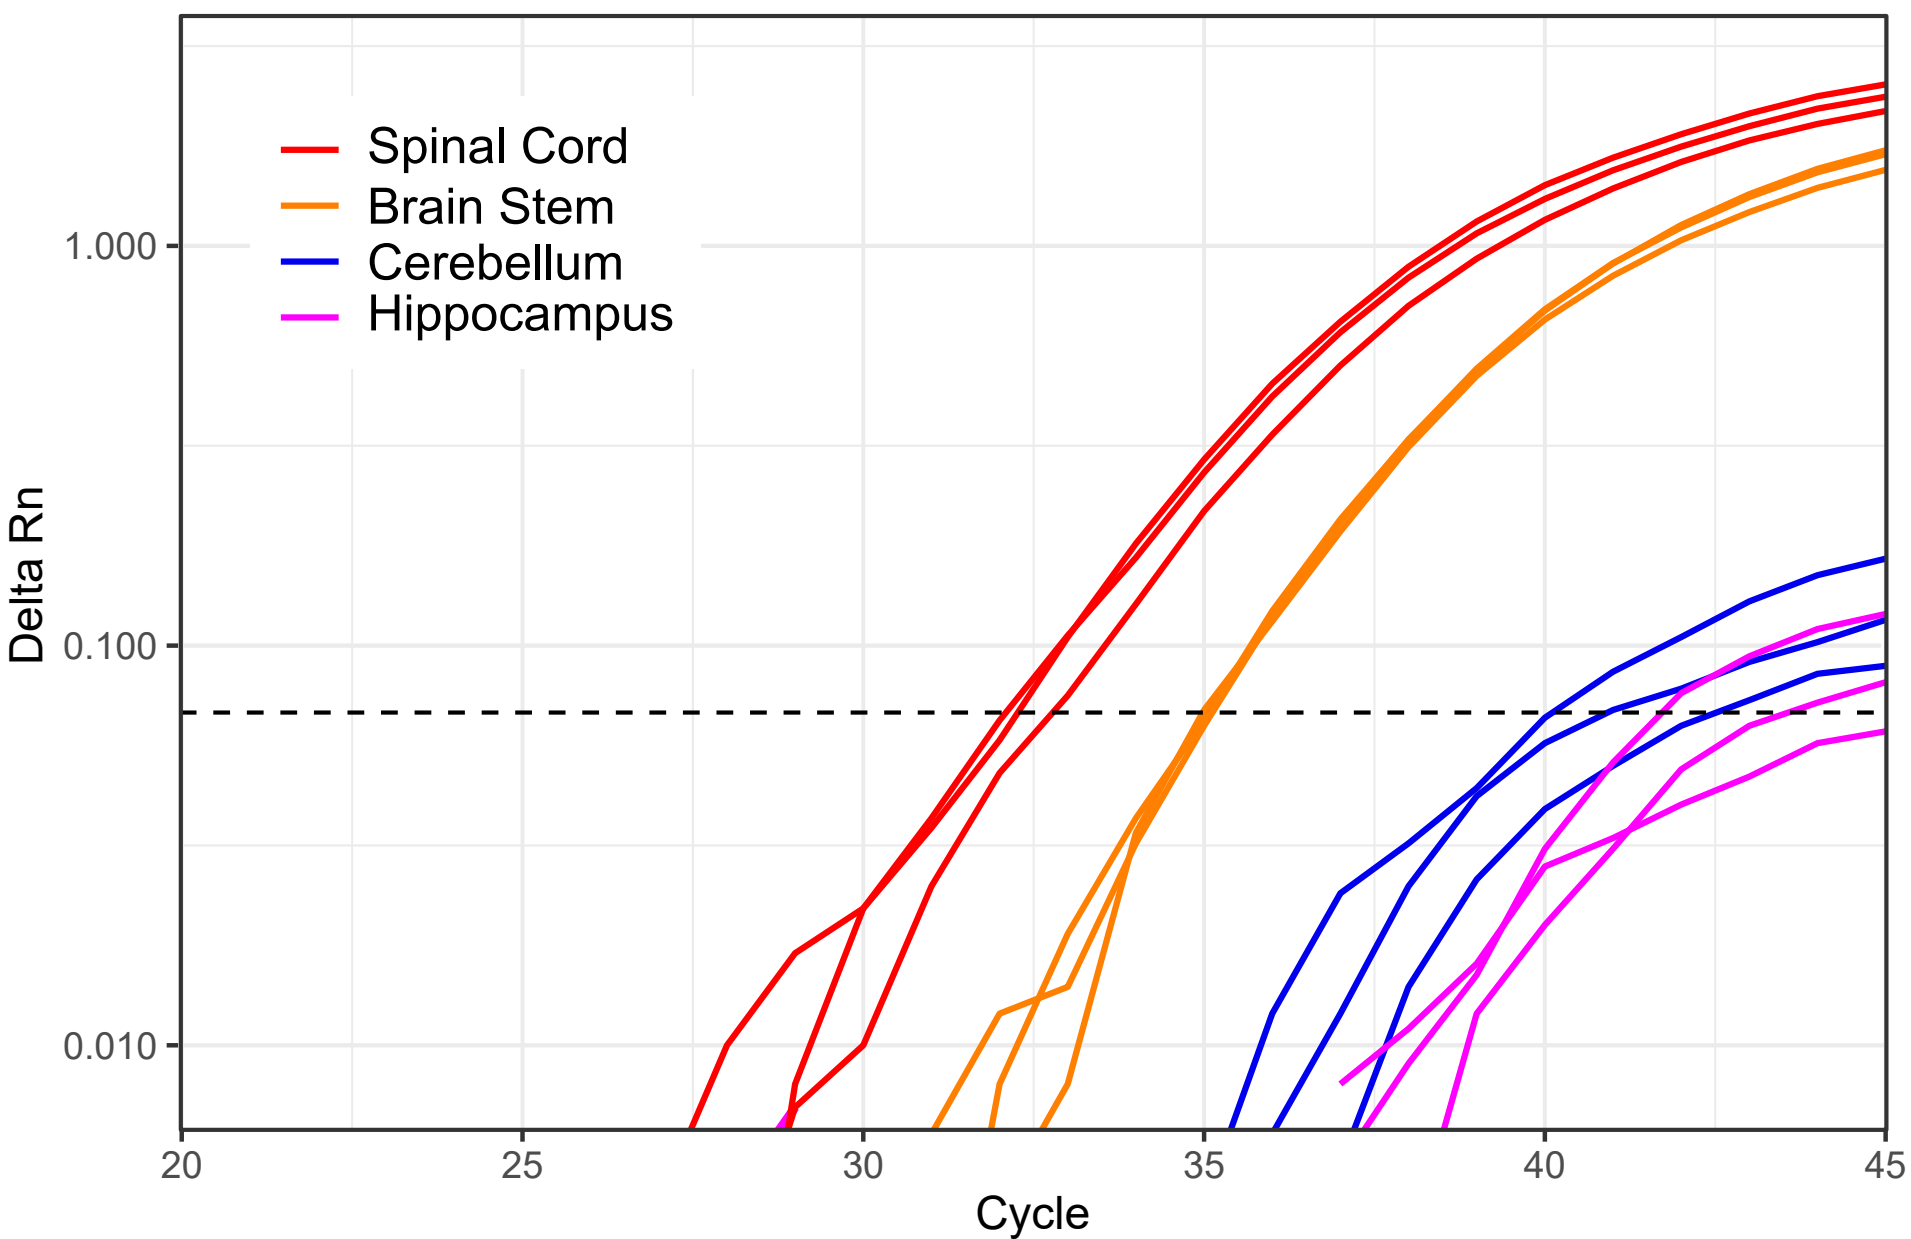

Figure 2. PCR amplification curves produced by LN34 RT-qPCR of different brain tissues from the 2019 PA juvenile raccoon case. Increasing rabies virus RNA level, as indicated by earlier amplification, can be observed from hippocampus to cerebellum to brain stem to rostral spinal cord. Threshold used for Cq value calculation is shown by dotted line. Triplicate results are shown.

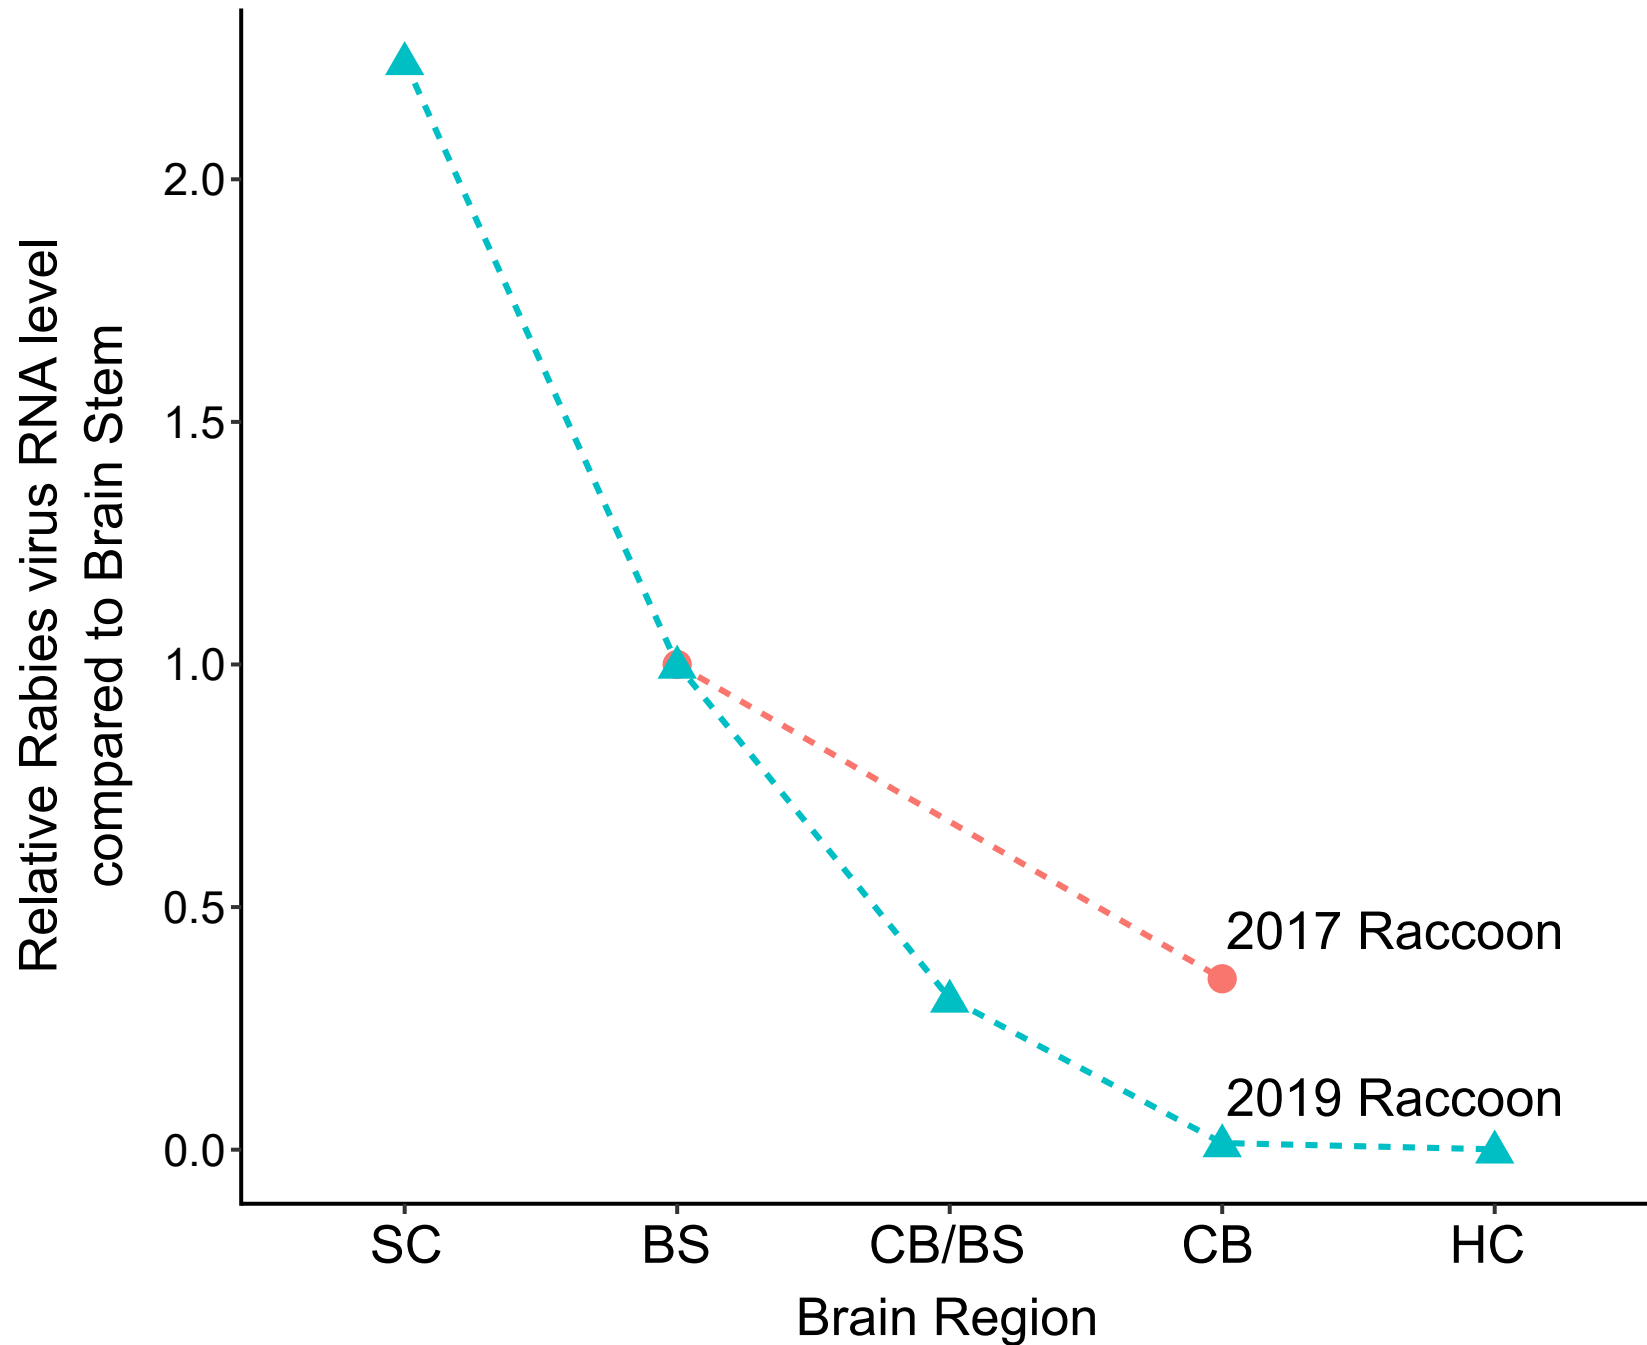

Figure 3. Relative rabies virus RNA level in different brain regions of 2017 and 2019 PA raccoon samples. Rabies virus RNA (LN34 Cq value) was normalized to beta actin Cq value and compared to brain stem using the  $\Delta\Delta Cq$  method (17). SC spinal cord, BS brain stem, CB/BS mix of brain stem and cerebellum, CB cerebellum, HC hippocampus/cortex.

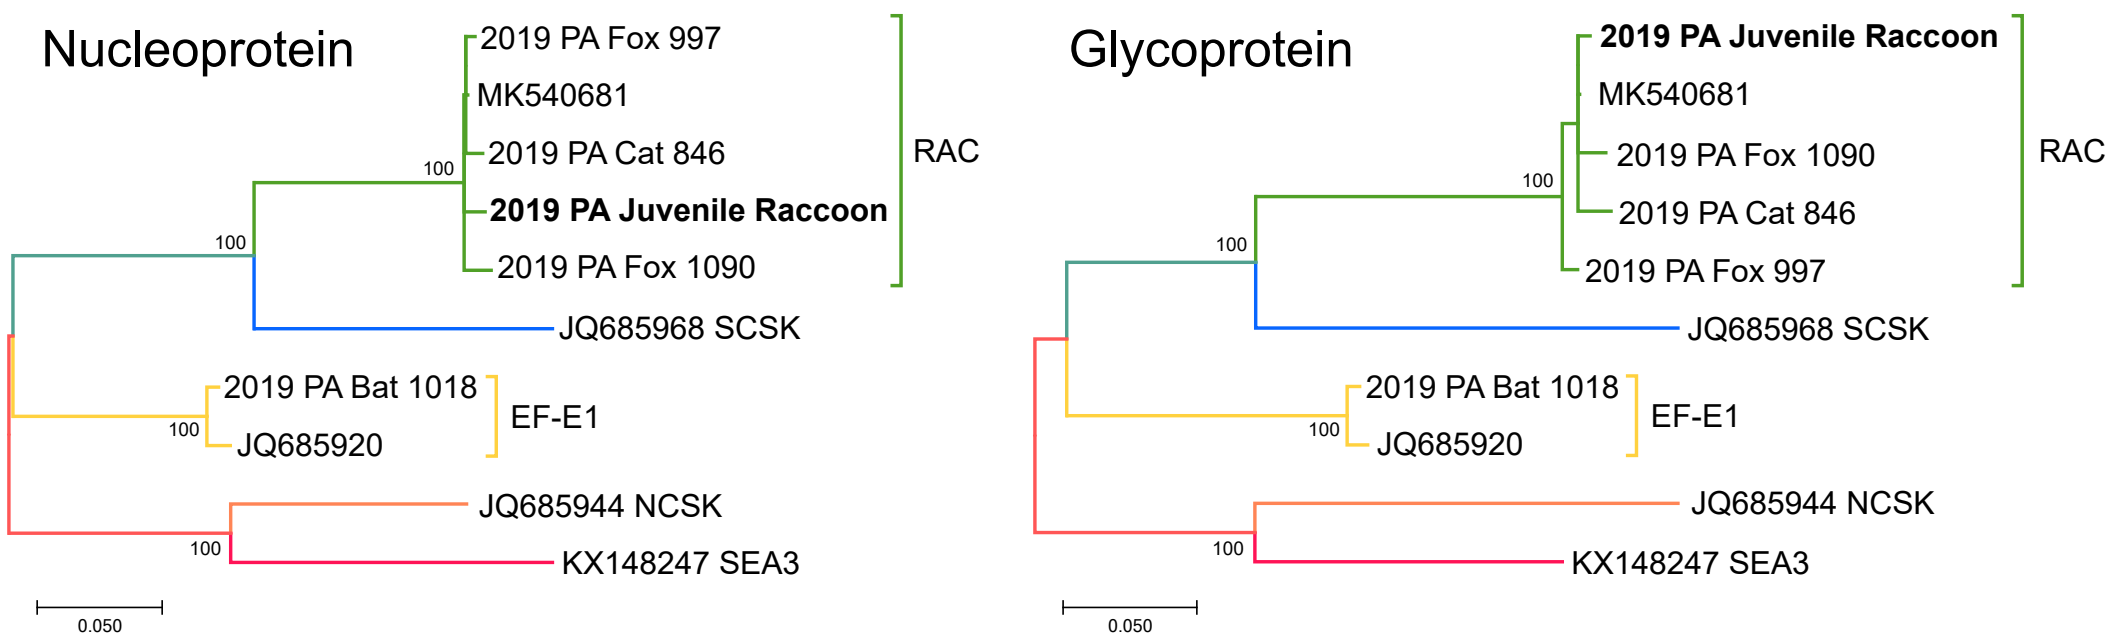

Figure 4. Phylogenetic trees showing clustering of PA 2019 juvenile raccoon rabies virus nucleoprotein (left) and glycoprotein (right) gene sequences with other rabies positive PA and reference sequences. Reference sequences from Eastern Raccoon (RAC), South Central Skunk (SCSK), *Eptesicus fuscus* Eastern 1 (EF-E1), North Central Skunk (NCSK) and South East Asia 3 (SEA3) rabies virus variants are shown with GenBank accession numbers. Branch color indicates variant: green is RAC, blue is SCSK, yellow is EF-E1, orange is NCSK and red is SEA3. The percentage of trees in which the associated taxa clustered together is shown next to the branches (based on 1,000 bootstraps). Scale bar indicates number of substitutions per site.
